# Supplementary material
Source: ML conference proceedings conference paper supplement (https://proceedings.neurips.cc/paper_files/paper/2021/hash/cd7c230fc5deb01ff5f7b1be1acef9cf-Abstract.html)
Supplement: Supplementary file 1 [file cd7c230fc5deb01ff5f7b1be1acef9cf-Supplemental.zip]

Archive with 6 entries (6 files):
- Adult_notebook.ipynb
- German_notebook.ipynb
- Image_notebook.ipynb
- Synth1_notebook.ipynb
- Synth2_notebook.ipynb
- Fairness_neurips_camera_appendix.pdf
