# Supplementary material
Source: ML conference proceedings conference paper supplement (https://proceedings.neurips.cc/paper_files/paper/2021/hash/cd7c230fc5deb01ff5f7b1be1acef9cf-Abstract.html)
Supplement: Supplementary file 1 [file cd7c230fc5deb01ff5f7b1be1acef9cf-Supplemental.zip › Adult_notebook.ipynb]

# %% [markdown]
### Adult Income Dataset
This dataset is provided by the UC Irvine ML Repository and can be found [here](https://archive.ics.uci.edu/ml/datasets/adult).  The inputs are demographic data about an individual in the form of 14 attributes, both categorical and numerical, and the task is to predict whether the individual makes more or less than $50,000/year.  This notebook can run without a GPU and will take a few minutes per trial, depending on how many training iterations you want.  

# %% [markdown]
### Data loading and pre-processing
This data processing script is from Jason Brownlee's blog [here](https://machinelearningmastery.com/imbalanced-classification-with-the-adult-income-dataset/), it uses one hot encoding for all categorical features and [0,1] scaling for numerical features. 


# %% [code]
from pandas import read_csv
import numpy as np
from sklearn.preprocessing import LabelEncoder
from sklearn.preprocessing import OneHotEncoder
from sklearn.preprocessing import MinMaxScaler
from sklearn.compose import ColumnTransformer
from sklearn.linear_model import LogisticRegression as LogReg

from time import time
import sys

# load the dataset
def load_dataset(full_path):
	# load the dataset as a numpy array
	dataframe = read_csv(full_path, header=None, na_values='?')
	# drop rows with missing
	dataframe = dataframe.dropna()
	# split into inputs and outputs
	last_ix = len(dataframe.columns) - 1
	X, y = dataframe.drop(last_ix, axis=1), dataframe[last_ix]
	# select categorical and numerical features
	cat_ix = X.select_dtypes(include=['object', 'bool']).columns
	num_ix = X.select_dtypes(include=['int64', 'float64']).columns
	# label encode the target variable to have the classes 0 and 1
	y = LabelEncoder().fit_transform(y)
	return X.values, y, cat_ix, num_ix
 
# define the location of the datasets
train_path = 'adult.data'
test_path = 'adult.test'
# load the train and test datasets
X_train, y_train, cat_ix, num_ix = load_dataset(train_path)
X_test, y_test, cat_ix, num_ix = load_dataset(test_path)
# set transformer to 1 hot encode categorical variables and scale numerical variables
ct = ColumnTransformer([('c',OneHotEncoder(),cat_ix), ('n',MinMaxScaler(),num_ix)], sparse_threshold=0)
# get encoded data inputs
data_train = ct.fit_transform(X_train)
data_test = ct.transform(X_test)

# %% [markdown]
### Dataset

Define a custom pytorch dataset which separates the dataset by a chosen set of attributes, as detailed in the comments.  We reported the cross sectional attributes in the paper.  

# %% [code]
import torch
from torch.utils.data import Dataset, DataLoader, Subset, RandomSampler

class AdultDataset(Dataset):
    def __init__(self, raw_data, transformed_data, labels, attributes='gender'):
        #attributes = 'gender' corresponds to gender: 0=female, 1=male
        #attributes = 'both' corresponds to race+gender: 
        # 0=white, female; 1=other,female; 2=white,male; 3=other,male
        self.attributes = attributes
        self.data = transformed_data
        self.labels = labels
        if self.attributes == 'gender':
            self.indices = [[]]*2
            self.indices[0] = np.argwhere(raw_data[:,9] == ' Female').squeeze()
            self.indices[1] = np.argwhere(raw_data[:,9] == ' Male').squeeze()
        elif self.attributes == 'both':
            self.indices = [[]]*4
            self.indices[0] = np.argwhere((raw_data[:,9] == ' Female') * (raw_data[:,8] == ' White')).squeeze()
            self.indices[1] = np.argwhere((raw_data[:,9] == ' Female') * (raw_data[:,8] != ' White')).squeeze()
            self.indices[2] = np.argwhere((raw_data[:,9] == ' Male') * (raw_data[:,8] == ' White')).squeeze()
            self.indices[3] = np.argwhere((raw_data[:,9] == ' Male') * (raw_data[:,8] != ' White')).squeeze()
        else:
            raise Exception("Set attributes to either 'gender' or 'both'")
            
    def __len__(self):
        return len(self.data)
    
    def __getitem__(self, idx):
        return self.data[idx], self.labels[idx]

trainset = AdultDataset(X_train, data_train, y_train, attributes='both')
testset = AdultDataset(X_test, data_test, y_test, attributes='both')

# %% [markdown]
### Oracle

Define our sampling oracle, which can provide samples of (feature,label) pairs of a specified attribute, sampled uniform at random with replacement over all training examples of that attribute.  

# %% [code]
class Oracle_adult():
    def __init__(self, dset, device=None, batch_size=50, naive=False):
        
        if device is None:
            device = 'cuda' if torch.cuda.is_available() else 'cpu'
        self.device = device
        self.batch_size = batch_size 
        self.naive = naive
        self.att_indices = dset.indices
        m = len(self.att_indices)
        self.attribute_iterators = []
        if self.naive:
            # for the naive scheme, disregard attributes and just sample uniformly
            # over the whole training set
            sampler = RandomSampler(dset, replacement=True, 
                                    num_samples=sys.maxsize)
            loader = DataLoader(dset, batch_size=self.batch_size, 
                                sampler=sampler, shuffle=False, num_workers=0)
            self.attribute_iterators.append(iter(loader))
        else:
            for i in range(m):
                #select all points in the dataset with attribute i
                data_subset = Subset(dset, self.att_indices[i])
                #create a random with replacement sampler over those points
                #num_samples is how many samples before the iterator ends
                sampler = RandomSampler(data_subset, replacement=True, 
                                        num_samples=sys.maxsize)
                loader = DataLoader(data_subset, batch_size=self.batch_size, 
                                    sampler=sampler, shuffle=False, num_workers=0)
                #create a dataloader with the subset of points+random sampler
                #and store an iterable of it                    
                self.attribute_iterators.append(iter(loader))
    def __call__(self, att=0, batch_size=None, return_idx=False):
        # these are the indices of the original, complete dataset
        # have to be careful to maintain its order if we are going to use them
        if return_idx:
            return self.att_indices[att]
        if self.naive:
            att = 0
        X, Y = next(self.attribute_iterators[att])
        #much faster if batch_size <= self.batch_size, the loop is slow
        if batch_size is not None:
            for i in range(batch_size // self.batch_size):
                x, y = next(self.attribute_iterators[att])
                X = torch.cat((X,x))
                Y = torch.cat((Y,y))
            X = X[:batch_size]
            Y = Y[:batch_size]

        return X.to(self.device), Y.to(self.device)

# %% [markdown]
Runs the algorithm: on each round, fit a logistic regression model to the 
accumulated training set and then evaluate its performance on the "validation" set `features2, use that performance and the specified scheme to select the next attribute to sample from and add to the training set.  Repeat for `TT` iterations, periodically recording test accuracy.  

# %% [code]
def Experiment0(model, train_oracle, test_data, test_labels, features1, labels1, 
                features2, labels2, attributes, 
                num_test, n0, TT=500, rule='ucb0', param=None, 
                forced='True', verbose=True):
    '''
    rule  :string   possible options are
                  ucb0 -- standard UCB
                  emp  -- empirical, i.e., greedy 
                  eps   -- epsilon greedy (with epsilon=param)
    attributes :list of ints, 0,1,... corresponding to the attribute classes
    '''
    # 2 for 'gender', 4 for 'both'
    m = len(attributes)
    # counters for testing frequency
    n = (TT-m*n0) // (TT//num_test)
    k=0
    # track accuracy and mixture distribution for each attribute over time
    total_acc = np.zeros((m,n))
    Pi = n0 * np.ones(m)
    # start the main loop
    for t in range(m*n0, TT):
        # fit the model to the training set
        model.fit(features1, labels1)

        #compute accuracy per attribute on the second set
        acc = np.zeros(m)
        for att in range(m):
            x, y = features2[att], labels2[att]
            yhat = torch.tensor(model.predict(x))
            correct = (yhat==y).sum()
            acc[att] = correct / len(y)

        # Point Selection Rule
        U = torch.zeros(m)
        if rule=='ucb0':# Optimistic Rule
            if param is None:
                param=0.1
            U = acc - param/np.sqrt(Pi)
        elif rule=='emp':# Empirical Rule
            U = acc
        elif rule=='eps':
            if param is None:
                param=0.1 # epsilon value for epsilon-greedy sampling
            if np.random.random()<param: # randomly choose one of the attributes
                idx = np.random.randint(0,m)
                U[idx] = -1
            else: # empirical sampling otherwise
                U = acc
        # choose the attribute with lower value of the index function U 
        # unless an attribute has fallen under the forcing threshhold
        if any(Pi < np.sqrt(t)) and forced:
            for att in attributes:
                if Pi[att] < np.sqrt(t):
                    at = att
                    break
        else:
            val = sys.maxsize
            for i,u in enumerate(U):
                if u < val:
                    at = i
                    val = u
        #if 
        if rule=='unif':
            at = t % 4
        Pi[at] += 1 

        #record accuracy of current model on a test set
        if t%(TT//num_test)==(TT//num_test - 1):
            for j, att in enumerate(attributes):
                total_acc[j, k] = (model.predict(test_data[att])==test_labels[att]).mean()
            k += 1

        
        # draw a sample from the chosen attribute 
        xt, yt = train_oracle(att=at, batch_size=2)
        features1 = torch.cat((features1, xt[0:1]), dim=0)
        labels1 = torch.cat((labels1, yt[0:1]), dim=0)
        features2[at] = torch.cat((features2[at], xt[1:2]), dim=0)
        labels2[at] = torch.cat((labels2[at], yt[1:2]), dim=0)
    
    return total_acc, Pi/Pi.sum()

# %% [markdown]
Specify parameters of the experiment here, options for scheme are `ucb0`, `emp`, for empirical/greedy, `eps` for epsilon-greedy, `unif`, and `naive`, which is what we referred to as `Uncurated` in the paper.  `TT` specifies the number of training iterations to run and `param` specifies the exploration parameter for both UCB and epsilon greedy.  This returns test accuracy over time for each trial, in `acc`, and the final mixture distribution selected by the sampling scheme for each trial in `pi`.  

# %% [code]
# Run the experiment 
def runExperiment0(train_oracle, 
    test_data, test_labels, num_test,
    attributes,
    n0=10,
    rule='ucb0',
    forced=True,
    param=0.2,
    n_trials=7,
    TT=500,
    verbose=False
):

    start_time = time()
    m = len(attributes)
    n = (TT-m*n0) // (TT//num_test)
    #accuracy and mixture dist for each attribute, over all trials, each TT//num_test epochs
    acc = np.zeros((1,n_trials,m,n))
    pi = np.zeros((1,n_trials,m))
    for i in range(n_trials):
        print('Starting trial {}/{} with rule = {}, forced = {}'.format(
           i+1, n_trials, rule, forced))
        
        # Initialize the model
        model = LogReg(max_iter=5000)
        # Get the initial training datasets (2*n0)
        x,y = train_oracle(att=0, batch_size=n0)
        features1 = x
        labels1 = y
        x,y = train_oracle(att=0, batch_size=n0)
        features2 = [x]
        labels2 = [y]
        for att in range(1,m):
            x,y = train_oracle(att=att, batch_size=n0)
            features1 = torch.cat((features1, x), dim=0)
            labels1 = torch.cat((labels1, y), dim=0)
            x,y = train_oracle(att=att, batch_size=n0)
            features2.append(x)
            labels2.append(y) 

        # Run the experiment to get one set of accuracies and pi vector
        temp_acc, pi_temp = Experiment0(model=model, train_oracle=train_oracle, test_data=test_data, test_labels=test_labels,
            features1=features1, labels1=labels1, features2=features2, labels2=labels2,
            num_test=num_test, attributes=attributes, n0=n0,  TT=TT,
            rule=rule, param=param, forced=forced, verbose=verbose
        )
        acc[0,i] = temp_acc
        pi[0,i] = pi_temp
        end_time=time()
        print('Completed {} trials in {:.2f} seconds \n \n'.format(i+1, -start_time+end_time)) 


    return acc, pi
  


TT = 5000
num_test=50
rule = 'ucb0'
naive = rule == 'naive'
forced = True
trials = 10
param = 0.1
#initialize the oracles
train_oracle = Oracle_adult(trainset, naive=naive)
test_oracle = Oracle_adult(testset)
test_data = []
test_labels = []
#split the test set by attribute, this is only for tracking purposes, it doesn't interact with training at all
for i in range(4):
    idx = test_oracle.att_indices[i]
    temp_data = data_test[idx]
    temp_labels = y_test[idx]
    test_data.append(temp_data)
    test_labels.append(temp_labels)

acc, pi = runExperiment0(train_oracle, test_data, test_labels, num_test, attributes=range(4), rule=rule, TT=TT, n_trials=trials, param=param, forced = forced)
