# Supplementary material
Source: ML conference proceedings conference paper supplement (https://proceedings.neurips.cc/paper_files/paper/2021/hash/cd7c230fc5deb01ff5f7b1be1acef9cf-Abstract.html)
Supplement: Supplementary file 1 [file cd7c230fc5deb01ff5f7b1be1acef9cf-Supplemental.zip › German_notebook.ipynb]

# %% [markdown]
### German Loan Dataset
This dataset is provided by the UC Irvine ML Repository and can be found [here](https://archive.ics.uci.edu/ml/datasets/statlog+(german+credit+data)).  The inputs are demographic and financial data about an individual and the task is to predict whether the individual is a high or low risk of defaulting on a loan.  This notebook can run without a GPU and will take a few minutes per trial, depending on how many training iterations you want.  


# %% [code]
from pandas import read_csv
import numpy as np
from sklearn.preprocessing import LabelEncoder
from sklearn.preprocessing import OneHotEncoder
from sklearn.preprocessing import MinMaxScaler
from sklearn.compose import ColumnTransformer
from sklearn.linear_model import LogisticRegression as LogReg

from time import time
import sys

# load the dataset
def load_dataset(full_path, sep=','):
	# load the dataset as a numpy array
	dataframe = read_csv(full_path, sep=sep, header=None)
	# drop rows with missing
	dataframe = dataframe.dropna()
	# split into inputs and outputs
	last_ix = len(dataframe.columns) - 1
	X, y = dataframe.drop(last_ix, axis=1), dataframe[last_ix]
	# select categorical and numerical features
	cat_ix = X.select_dtypes(include=['object', 'bool']).columns
	num_ix = X.select_dtypes(include=['int64', 'float64']).columns
	# label encode the target variable to have the classes 0 and 1
	y = LabelEncoder().fit_transform(y)
	return X.values, y, cat_ix, num_ix
 
# define the location of the datasets
train_path = 'german.data'
# load the train and test datasets
X, Y, cat_ix, num_ix = load_dataset(train_path, sep=' ')

# set transformer to 1 hot encode categorical variables and scale numerical variables
ct = ColumnTransformer([('c',OneHotEncoder(),cat_ix), ('n',MinMaxScaler(),num_ix)], sparse_threshold=0)
# get encoded data inputs
data = ct.fit_transform(X)

# %% [markdown]
### Dataset

Define a custom pytorch dataset which separates the dataset by male and female, our chosen attributes.  

# %% [code]
import torch
from torch.utils.data import Dataset, DataLoader, Subset, RandomSampler

class GermanDataset(Dataset):
    def __init__(self, raw_data, transformed_data, labels):
        #attributes = 'gender' corresponds to gender: 0=female, 1=male
        self.data = transformed_data
        self.labels = labels
        self.indices = [[]]*2
        self.indices[0] = np.argwhere((raw_data[:,8] == 'A92')+(raw_data[:,8]=='A95')).squeeze()
        self.indices[1] = np.argwhere((raw_data[:,8] == 'A91')+(raw_data[:,8] == 'A93')+(raw_data[:,8] == 'A94')).squeeze()
            
    def __len__(self):
        return len(self.data)
    
    def __getitem__(self, idx):
        return self.data[idx], self.labels[idx]

#generate random 70/30 training testing split
perm = np.random.permutation(1000)
X_test, y_test, data_test = X[perm[700:]], y[perm[700:]], data[perm[700:]]
X_train, y_train, data_train = X[perm[:700]], y[perm[:700]], data[perm[:700]]
trainset = GermanDataset(X_train, data_train, y_train)
testset = GermanDataset(X_test, data_test, y_test)

# %% [markdown]
### Oracle

Define our sampling oracle, which can provide samples of (feature,label) pairs of a specified attribute, sampled uniform at random with replacement over all training examples of that attribute.  


# %% [code]
class Oracle_german():
    def __init__(self, dset, device=None, batch_size=50, naive=False):
        
        if device is None:
            device = 'cuda' if torch.cuda.is_available() else 'cpu'
        self.device = device
        self.batch_size = batch_size 
        self.naive = naive
        self.att_indices = dset.indices
        m = len(self.att_indices)
        self.attribute_iterators = []
        if self.naive:
            sampler = RandomSampler(dset, replacement=True, 
                                num_samples=sys.maxsize)
            loader = DataLoader(dset, batch_size=self.batch_size, 
                                sampler=sampler, shuffle=False, num_workers=0)
            self.attribute_iterators.append(iter(loader))
        else:
            for i in range(m):
                #select all points in the dataset with attribute i
                data_subset = Subset(dset, self.att_indices[i])
                #create a random with replacement sampler over those points
                #num_samples is how many samples before the iterator ends
                sampler = RandomSampler(data_subset, replacement=True, 
                                        num_samples=sys.maxsize)
                loader = DataLoader(data_subset, batch_size=self.batch_size, 
                                    sampler=sampler, shuffle=False, num_workers=0)
                #create a dataloader with the subset of points+random sampler
                #and store an iterable of it                    
                self.attribute_iterators.append(iter(loader))
    def __call__(self, att=0, batch_size=None, return_idx=False):
        # these are the indices of the original, complete dataset
        # have to be careful to maintain its order if we are going to use them

        if self.naive:
            att = 0
        if return_idx:
            return self.att_indices[att]
  
        X, Y = next(self.attribute_iterators[att])

        #this discards some samples if the batch_sizes don't line up
        #since it's uniform with replacement, that shouldn't matter
        if batch_size is not None:
            for i in range(batch_size // self.batch_size):
                x, y = next(self.attribute_iterators[att])
                X = torch.cat((X,x))
                Y = torch.cat((Y,y))
            X = X[:batch_size]
            Y = Y[:batch_size]

        return X.to(self.device), Y.to(self.device)

# %% [markdown]
Runs the algorithm: on each round, fit a logistic regression model to the 
accumulated training set and then evaluate its performance on the "validation" set `features2, use that performance and the specified scheme to select the next attribute to sample from and add to the training set.  Repeat for `TT` iterations, periodically recording test accuracy.  

# %% [code]
def Experiment0(model, train_oracle, test_data, test_labels, features1, labels1, 
                features2, labels2, attributes, 
                num_test, n0, TT=500, rule='ucb0', param=None, 
                forced='True', verbose=True):
    '''
    rule  :string   possible options are
                  ucb0 -- standard UCB
                  emp  -- empirical, i.e., greedy 
                  eps   -- epsilon greedy (with epsilon=param)
    attributes :list of ints, 0,1,... corresponding to the attribute classes
    '''
    # 2 for 'gender', 4 for 'both'
    m = len(attributes)
    # counters for testing frequency
    n = (TT-m*n0) // (TT//num_test)
    k=0
    # track accuracy and mixture distribution for each attribute over time
    total_acc = np.zeros((m,n))
    Pi = n0 * np.ones(m)
    # start the main loop
    for t in range(m*n0, TT):
        # fit the model to the training set
        model.fit(features1, labels1)

        #compute accuracy per attribute on the second set
        acc = np.zeros(m)
        for att in range(m):
            x, y = features2[att], labels2[att]
            yhat = torch.tensor(model.predict(x))
            correct = (yhat==y).sum()
            acc[att] = correct / len(y)

        # Point Selection Rule
        U = torch.zeros(m)
        if rule=='ucb0':# Optimistic Rule
            if param is None:
                param=0.1
            U = acc - param/np.sqrt(Pi)
        elif rule=='emp':# Empirical Rule
            U = acc
        elif rule=='eps':
            if param is None:
                param=0.1 # epsilon value for epsilon-greedy sampling
            if np.random.random()<param: # randomly choose one of the attributes
                idx = np.random.randint(0,m)
                U[idx] = -1
            else: # empirical sampling otherwise
                U = acc
        # choose the attribute with lower value of the index function U 
        # unless an attribute has fallen under the forcing threshhold
        if any(Pi < np.sqrt(t)) and forced:
            for att in attributes:
                if Pi[att] < np.sqrt(t):
                    at = att
                    break
        else:
            val = sys.maxsize
            for i,u in enumerate(U):
                if u < val:
                    at = i
                    val = u
        #if 
        if rule=='unif':
            at = t % 4
        Pi[at] += 1 

        #record accuracy of current model on a test set
        if t%(TT//num_test)==(TT//num_test - 1):
            for j, att in enumerate(attributes):
                total_acc[j, k] = (model.predict(test_data[att])==test_labels[att]).mean()
            k += 1
        
        # draw a sample from the chosen attribute 
        xt, yt = train_oracle(att=at, batch_size=2)
        features1 = torch.cat((features1, xt[0:1]), dim=0)
        labels1 = torch.cat((labels1, yt[0:1]), dim=0)
        features2[at] = torch.cat((features2[at], xt[1:2]), dim=0)
        labels2[at] = torch.cat((labels2[at], yt[1:2]), dim=0)
    
    return total_acc, Pi/Pi.sum()

# %% [markdown]
Specify parameters of the experiment here, options for scheme are `ucb0`, `emp`, for empirical/greedy, `eps` for epsilon-greedy, `unif`, and `naive`, which is what we referred to as `Uncurated` in the paper.  `TT` specifies the number of training iterations to run and `param` specifies the exploration parameter for both UCB and epsilon greedy.  This returns test accuracy over time for each trial, in `acc`, and the final mixture distribution selected by the sampling scheme for each trial in `pi`.  

The additional code in this instantiation of the algorithm is due to the very small set of data available here and the lack of provided training/test splits.  So on each trial we generate a new, random train/test split.  

# %% [code]
# Run the experiment 
def runExperiment0(X, Y, data, num_test,
    attributes,
    n0=10,
    rule='ucb0',
    forced=True,
    param=0.2,
    n_trials=7,
    TT=500,
    verbose=False
):

    start_time = time()
    m = len(attributes)
    n = (TT-m*n0) // (TT//num_test)
    #accuracy and mixture dist for each attribute, over all trials, each TT//num_test epochs
    acc = np.zeros((1,n_trials,m,n))
    pi = np.zeros((1,n_trials,m))
    for i in range(n_trials):
        print('Starting trial {}/{} with rule = {}, forced = {}'.format(
           i+1, n_trials, rule, forced))
        #generate new random train/test split
        perm = np.random.permutation(1000)
        X_test, y_test, data_test = X[perm[700:]], Y[perm[700:]], data[perm[700:]]
        X_train, y_train, data_train = X[perm[:700]], Y[perm[:700]], data[perm[:700]]
        trainset = GermanDataset(X_train, data_train, y_train)
        testset = GermanDataset(X_test, data_test, y_test)

        train_oracle = Oracle_german(trainset, naive=naive)
        test_oracle = Oracle_german(testset)
        test_data = []
        test_labels = []
        for j in range(m):
            idx = test_oracle.att_indices[j]
            temp_data = data_test[idx]
            temp_labels = y_test[idx]
            test_data.append(temp_data)
            test_labels.append(temp_labels)


        # Initialize the model
        model = LogReg(max_iter=5000)
        # Get the initial training datasets (2*n0)
        x,y = train_oracle(att=0, batch_size=n0)
        features1 = x
        labels1 = y
        x,y = train_oracle(att=0, batch_size=n0)
        features2 = [x]
        labels2 = [y]
        for att in range(1,m):
            x,y = train_oracle(att=att, batch_size=n0)
            features1 = torch.cat((features1, x), dim=0)
            labels1 = torch.cat((labels1, y), dim=0)
            x,y = train_oracle(att=att, batch_size=n0)
            features2.append(x)
            labels2.append(y) 

        # Run the experiment to get one set of accuracies and pi vector
        temp_acc, pi_temp = Experiment0(model=model, train_oracle=train_oracle, test_data=test_data, test_labels=test_labels,
            features1=features1, labels1=labels1, features2=features2, labels2=labels2,
            num_test=num_test, attributes=attributes, n0=n0,  TT=TT,
            rule=rule, param=param, forced=forced, verbose=verbose
        )
        acc[0,i] = temp_acc
        pi[0,i] = pi_temp
        end_time=time()
        print('Completed {} trials in {:.2f} seconds \n \n'.format(i+1, -start_time+end_time)) 


    return acc, pi
  

TT = 700
num_test=70
rule = 'ucb0'
naive = rule == 'naive'
forced = True
trials = 10
param = 0.1
n = 10


acc, pi = runExperiment0(X, Y, data, num_test=num_test, attributes=range(2), rule=rule, TT=TT, n_trials=n, param=param, forced = forced)
