# Supplementary material
Source: ML conference proceedings conference paper supplement (https://proceedings.neurips.cc/paper_files/paper/2021/hash/cd7c230fc5deb01ff5f7b1be1acef9cf-Abstract.html)
Supplement: Supplementary file 1 [file cd7c230fc5deb01ff5f7b1be1acef9cf-Supplemental.zip › Image_notebook.ipynb]

# %% [markdown]
## Experiment 3: Dataset construction for multi-task learning 

We consider the following datasets: 
* UTKFace
* FashionMNIST 
* Cifar10 

### Description of the problem. 
FashionMNIST and Cifar10  have 10 classes, which we use to define five binary classification problems. The task then is to learn a neural-network which can simultaneously perform well on all five of the binary classification tasks. In particular for the three datasets, we consider the following binary classification problems:
* FashionMNIST: `TShirt vs Shirt`, `Pullover` vs `Coat`, `Trousers` vs `Dress`, `Sandals` vs `Bag` and `Sneakers` vs `AnkleBoots`
* Cifar10: `airplane` vs `ship`, `automobile` vs `truck`, `bird` vs `cat`, `deer` vs `dog` and `frog` vs `horse`

The choice of 5 problems has been made based on the confusion matrices of the best existing neural networks such that there is a mix of `hard` and `easy` problems.

For UTKFace, data is labelled with age, gender, and ethnicity.  We use gender, male or female, as the label to be predicted and ethnicity; white, Black, Asian, Indian, or other; as the attribute.  

We use the `heuristic` variant of the algorithms which work in a batch setting. 

# %% [code]
import matplotlib.pyplot as plt
import numpy as np
from math import sqrt
import sys
import os
from time import time
from PIL import Image

# %% [code]
import torch
from torch import nn, optim
import torch.nn.functional as F
from torch.utils.data import Dataset, DataLoader, Subset, RandomSampler, ConcatDataset
from torchvision import datasets, transforms

# %% [code]
#custom pytorch dataset for the UTKFace data, note that labels is a tuple of (age,gender,ethnicity) here
class UTKFaceDataset(Dataset):
    def __init__(self, root_dir, transform=None):
        self.root_dir = root_dir
        self.transform = transform
        self.image_files = os.listdir(self.root_dir)
        self.labels = [list(map(int, img_name.split('_')[:3])) for img_name in self.image_files
                      if img_name.endswith('.jpg')]
        path = os.path.join(self.root_dir, self.image_files[0])
        x = Image.open(path)
        if self.transform:
            x = self.transform(x)
        self.data = torch.empty((len(self.image_files), *x.shape))
        for i, file in enumerate(self.image_files):
            if file.endswith('.jpg'):
                path = os.path.join(self.root_dir, file)
                x = Image.open(path)
                if self.transform:
                    x = self.transform(x)
                self.data[i] = x       
        
    def __len__(self):
        return len(self.labels)

    def __getitem__(self,idx):
        #returns a tuple of the transformed image and a list of labels [age,gender,ethnicity]
        if torch.is_tensor(idx):
            idx = idx.tolist()
        
        image = self.data[idx]
        labels = self.labels[idx]
        
        return (image,labels)

# %% [markdown]
### Data pre-processing 
Select which experiment to run here. This sets up the datasets, transformations, and the attributes for FashionMNIST and CIFAR10.  FashionMNIST and CIFAR are available via pytorch and should require no additional setup, you can download the data for UTKFace [here](https://susanqq.github.io/UTKFace/).  

# %% [code]
DatasetName = 'FashionMNIST' 
#DatasetName = 'CIFAR10'
#DatasetName = 'UTKFace'

#trainsform for MNIST and FashionMNIST
transform = transforms.Compose([transforms.ToTensor(),
                                transforms.Normalize((0.5,), (0.5,))])

if DatasetName == 'FashionMNIST':
    trainset = datasets.FashionMNIST('./data', download=True, train=True, transform=transform)
    validationset = datasets.FashionMNIST('./data', download=True, train=False, transform=transform)
    pairs = ((0,6), (2,4), (1,3), (5,8), (7,9))

elif DatasetName=='CIFAR10':
    RC   = transforms.RandomCrop(28, padding=1) 
    RHF  = transforms.RandomHorizontalFlip() 
    RVF  = transforms.RandomVerticalFlip()
    NRM  = transforms.Normalize((0.4914, 0.4822, 0.4465), (0.2023, 0.1994, 0.2010))
    TT   = transforms.ToTensor()
    TPIL = transforms.ToPILImage()
    Cifar10transform = transforms.Compose([RC, RHF, TT, NRM])

    trainset = datasets.CIFAR10('./data', download=True, train=True, transform=Cifar10transform)
    validationset = datasets.CIFAR10('./data', download=True, train=False, transform=Cifar10transform)
    pairs = ((0,8), (1, 9), (2,3), (4,5), (6,7))
    
elif DatasetName=='UTKFace':
    # Scale images down to W0xW0
    W0 = 50
    mean=[0.5940, 0.4544, 0.3888]
    std=[0.1267, 0.1160, 0.1211]
    # Define the composition of the transforms
    transform = transforms.Compose([transforms.Resize(W0),
                                    transforms.ToTensor(),
                                    transforms.Normalize(mean=mean, std=std)                             
                                   ])
    train_dir = './UTKFace'
    test_dir = './crop_part1'
    #these can take quite a bit of time depending on your I/O, but it makes the training much quicker
    trainset = UTKFaceDataset(train_dir, transform)
    validationset = UTKFaceDataset(test_dir, transform)
    pairs=None

# %% [markdown]
### Oracle
This defines classes for our sampling oracle, which can generate a batch of samples from a specified attribute.  `naive` overrides this behavior, returning a random sample from the entire dataset, corresponding to the `Uncurated` scheme in the paper.  This can run as-is for the datasets listed above. To create an oracle for another dataset, the operative part is `get_sample(att=i)` which returns uniform at random with replacement draws out of the entire set of training samples&mdash;(features,label) pairs&mdash;which have attribute `i`.   Note that `get_sample()` is called very frequently during training, so any setup or processing that you can frontload in constructing the dataset/oracle is likely to make the algorithm run significantly faster.  

# %% [code]
class Oracle_face():
    def __init__(self, dset, device=None, batch_size=50, naive=False):
        if device is None:
            device = 'cuda' if torch.cuda.is_available() else 'cpu'
        self.device = device
        self.batch_size = batch_size 
        self.naive = naive
        
        #find all the sample indices associated with each attribute
        self.att_indices = [[] for i in range(5)]
        for i, y in enumerate(dset.labels):
            self.att_indices[y[2]].append(i)       

        self.attribute_iterators = []
        if self.naive:
            #create a random with replacement sampler over those points
            #num_samples is how many samples before the iterator ends
            sampler = RandomSampler(dset, replacement=True, 
                                    num_samples=sys.maxsize)
            loader = DataLoader(dset, batch_size=self.batch_size, 
                                sampler=sampler, shuffle=False, num_workers=0)
            #create a dataloader with the subset of points+random sampler
            #and store an iterable of it    
            self.attribute_iterators.append(iter(loader))
        else:
            for i in range(5):
                #select all points in the dataset with attribute i
                data_subset = Subset(dset, self.att_indices[i])
                #create a random with replacement sampler over those points
                #num_samples is how many samples before the iterator ends
                sampler = RandomSampler(data_subset, replacement=True, 
                                        num_samples=sys.maxsize)
                loader = DataLoader(data_subset, batch_size=self.batch_size, 
                                    sampler=sampler, shuffle=False, num_workers=0)
                #create a dataloader with the subset of points+random sampler
                #and store an iterable of it    
                self.attribute_iterators.append(iter(loader))
            
    def get_sample(self, att=0, batch_size=None):
        if self.naive:
            att=0
        X, Y = next(self.attribute_iterators[att])
        Y = Y[1]
        #it's more efficient to have the batch_size <= self.batch_size, this loop is slow
        if batch_size is not None:
            for i in range(batch_size // self.batch_size):
                x, y = next(self.attribute_iterators[att])
                y = y[1]
                X = torch.cat((X,x))
                Y = torch.cat((Y,y))
            X = X[:batch_size]
            Y = Y[:batch_size]

        return X.to(self.device), Y.to(self.device)
    

# %% [code]
class Oracle_loader():
    def __init__(self, dset, pairs=None, device=None, batch_size=50, naive=False):
        if device is None:
            device = 'cuda' if torch.cuda.is_available() else 'cpu'
        self.device = device
        self.batch_size = batch_size 
        self.pairs=pairs
        self.problem = problem
        self.naive = naive
        
        self.attribute_iterators = []
        if naive:
            sampler = RandomSampler(dset, replacement=True, 
                        num_samples=sys.maxsize)
            loader = DataLoader(dset, batch_size=self.batch_size, 
                                sampler=sampler, shuffle=False, num_workers=0)
            self.attribute_iterators.append(iter(loader))
        else:
            m = len(self.pairs)
            #find all the sample indices associated with each attribute
            self.pair_indices = [[] for i in range(m)]
            for i, y in enumerate(dset.targets):
                for j, pair in enumerate(self.pairs):
                    if y in pair:
                        self.pair_indices[j].append(i)        
            for i in range(m):
                #select all points in the dataset with attribute i
                data_subset = Subset(dset, self.pair_indices[i])
                #create a random with replacement sampler over those points
                #num_samples is how many samples before the iterator ends
                sampler = RandomSampler(data_subset, replacement=True, 
                                        num_samples=sys.maxsize)
                loader = DataLoader(data_subset, batch_size=self.batch_size, 
                                    sampler=sampler, shuffle=False, num_workers=0)
                #create a dataloader with the subset of points+random sampler
                #and store an iterable of it                    
                self.attribute_iterators.append(iter(loader))
            
    def get_sample(self, att=0, batch_size=None):
        if self.naive:
            att=0
        
        X, Y = next(self.attribute_iterators[att])
        #it's more efficient to have the batch_size <= self.batch_size, this loop is slow
        if batch_size is not None:
            for i in range(batch_size // self.batch_size):
                x, y = next(self.attribute_iterators[att])
                X = torch.cat((X,x))
                Y = torch.cat((Y,y))
            X = X[:batch_size]
            Y = Y[:batch_size]
        #generate the labels for the overall binary classification task
        zero_idx = Y==self.pairs[att][0]
        one_idx = Y==self.pairs[att][1]
        Y[zero_idx] = 0
        Y[one_idx] = 1
        return X.to(self.device), Y.to(self.device)

# %% [code]
# Bare bones dataset framework, used to accumulate samples as we build the training set
class accum_set(Dataset):
    def __init__(self, data, labels):
        self.data = data
        self.labels = labels
    
    def __len__(self):
        return len(self.labels)

    def __getitem__(self,idx):
        if torch.is_tensor(idx):
            idx = idx.tolist()
        
        image = self.data[idx]
        labels = self.labels[idx]
        
        return (image,labels)

# %% [markdown]
### CNN Model

# %% [markdown]
Explanation of Model Architecture

* [Convolutional layers](https://pytorch.org/docs/stable/generated/torch.nn.Conv2d.html), the Convolutional layer is used to create a convolution kernel that is convolved with the layer input to produce a tensor of outputs.
* [Maxpooling layers](https://pytorch.org/docs/stable/generated/torch.nn.MaxPool2d.html), the Maxpooling layer is used to downsample an input representation keeping the most active pixels from the previous layer.
* The usual [Linear](https://pytorch.org/docs/stable/generated/torch.nn.Linear.html) + [Dropout](https://pytorch.org/docs/stable/generated/torch.nn.Dropout2d.html) layers to avoid overfitting and produce a 10-dim output.
* We had used [Relu](https://pytorch.org/docs/stable/generated/torch.nn.ReLU.html) Non Linearity for the model and [logsoftmax](https://pytorch.org/docs/stable/generated/torch.nn.LogSoftmax.html) at the last layer because we are going to use the [NLLL loss](https://pytorch.org/docs/stable/generated/torch.nn.NLLLoss.html).

`CNN` is the baseline network we considered, `CNN_small` is the same architecture with the second convolutional layer removed, this is appropriate and slightly faster for smaller problems such as FashionMNIST.  `CNN_UTK` is also the same architecture but with some added flexibility to handle different down-scalings of the `UTKFace` inputs.  

# %% [code]
class CNN(nn.Module):
    
    def __init__(self, problem='MNIST'):
        super(CNN, self).__init__()

        in_channels = 1 if problem in ['MNIST', 'FashionMNIST'] else 3
        
        self.convlayer1 = nn.Sequential(
            nn.Conv2d(in_channels, 32, 3,padding=1),
            nn.BatchNorm2d(32),
            nn.ReLU(),
            nn.MaxPool2d(kernel_size=2, stride=2)
        )
        
        self.convlayer2 = nn.Sequential(
            nn.Conv2d(32,64,3),
            nn.BatchNorm2d(64),
            nn.ReLU(),
            nn.MaxPool2d(2)
        )
        
        self.fc1 = nn.Linear(64*6*6,600)
        self.drop = nn.Dropout2d(0.25)
        self.fc2 = nn.Linear(600, 120)
        self.fc3 = nn.Linear(120, 2)
        
    def forward(self, x):
        x = self.convlayer1(x)
        x = self.convlayer2(x)
        x = x.view(-1,64*6*6)
        x = self.fc1(x)
        x = self.drop(x)
        x = self.fc2(x)
        x = self.fc3(x)
        
        return F.log_softmax(x,dim=1)
    
class CNN_small(nn.Module):
    
    def __init__(self, problem='MNIST'):
        super(CNN, self).__init__()

        in_channels = 1 if problem in ['MNIST', 'FashionMNIST'] else 3
        
        self.convlayer1 = nn.Sequential(
            nn.Conv2d(in_channels, 32, 3,padding=1),
            nn.BatchNorm2d(32),
            nn.ReLU(),
            nn.MaxPool2d(kernel_size=2, stride=2)
        )
        
        self.fc1 = nn.Linear(32*14*14,600)
        self.drop = nn.Dropout2d(0.25)
        self.fc2 = nn.Linear(600, 120)
        self.fc3 = nn.Linear(120, 2)
        
    def forward(self, x):
        x = self.convlayer1(x)
        x = x.view(-1,32*14*14)
        x = self.fc1(x)
        x = self.drop(x)
        x = self.fc2(x)
        x = self.fc3(x)
        
        return F.log_softmax(x,dim=1)

#For UTK
# Define a function which calculates the output size 
def outputSize(in_size, kernel_size, stride=1, padding=0):
    output = int((in_size - kernel_size + 2*(padding)) / stride) + 1
    return(output)


class CNN_UTK(nn.Module):
    def __init__(self, w0=50, problem=None):
        super(CNN_UTK, self).__init__()

        
        self.convlayer1 = nn.Sequential(
            nn.Conv2d(3, 32, 3,padding=1),
            nn.BatchNorm2d(32),
            nn.ReLU(),
            nn.MaxPool2d(kernel_size=2, stride=2)
        )

        w1 = outputSize(w0, kernel_size=3, stride=1, padding=1)
        w1 = outputSize(w1, kernel_size=2, stride=2)
        
        self.convlayer2 = nn.Sequential(
            nn.Conv2d(32,64,kernel_size=3, stride=1, padding=0),
            nn.BatchNorm2d(64),
            nn.ReLU(),
            nn.MaxPool2d(kernel_size=2, stride=1, padding=0)
        )
        
        w2 = outputSize(w1, kernel_size=3, stride=1, padding=0)
        w2 = outputSize(w2, kernel_size=2, stride=1, padding=0)
        self.w2 = w2

        self.fc1 = nn.Linear(64*w2*w2,600)
        self.drop = nn.Dropout2d(0.25)
        self.fc2 = nn.Linear(600, 120)
        self.fc3 = nn.Linear(120, 2)
        
    def forward(self, x):
        x = self.convlayer1(x)
        x = self.convlayer2(x)
        x = x.view(-1,64*self.w2*self.w2)
        x = self.fc1(x)
        x = self.drop(x)
        x = self.fc2(x)
        x = self.fc3(x)
        
        return F.log_softmax(x,dim=1)

class LinearModel(nn.Module):
    def __init__(self, w0=50, C=3):
        super(LinearModel, self).__init__()
        self.w0 = w0
        self.C = C

        self.fc1 = nn.Linear(C*w0*w0, 100)
        self.fc2 = nn.Linear(100, 2)
    def forward(self, x):
        if len(x.shape)>2:
            x = x.view(-1, self.C*self.w0*self.w0)
        x = F.relu(self.fc1(x))
        x = F.relu(self.fc2(x))
        output = F.log_softmax(x, dim=1)
        return output 


# %% [code]
#helper function to calculate the empirical loss of a model according to how many times each attribute has been sampled
def getEmpiricalLoss(model, counts, SO, device, bs=50, ucb_factor=0.0):
    '''
    SO = Sampling Oracle, counts = how many batches to draw for each attribute
    '''
    k = 1000 #max number of samples to draw/eval at once, decrease this if GPU runs out of memory
    Correct = torch.zeros(len(counts))
    
    model.eval()
    with torch.no_grad():
        for att in range(len(counts)):
            # Counts gives the number of batches to draw for each attribute.
            # On validation runs this is the # of times the sampling scheme has selected the attribute
            nb = int(counts[att]) 
            remainder = nb*bs % k
            if remainder != 0:
                xv, yv = SO.get_sample(att=att, batch_size=remainder)
                pred = model(xv).argmax(dim=1)
                temp = (pred==yv).sum().item()
            else:
                temp = 0
            for i in range(nb*bs//k):
                xv, yv = SO.get_sample(att=att, batch_size=k)
                pred = model(xv).argmax(dim=1)
                temp += (pred==yv).sum().item()
            Correct[att] = temp/(nb*bs)
    model.train()
    return Correct

# %% [code]
#helper function to apply the various sampling rules
def getAttribute(model, device, DO, counts, scheme='ucb', initial=10,  ucb_factor=0.1, epsilon=0.1, Pi=None):
    #DO = oracle
    batch_size = 50
    num_groups = len(counts)
    if scheme=='empirical': #empirical is the same as epsilon greedy with epsilon=0
        scheme = 'epsilon-greedy'
        epsilon = 0.0  
    if scheme=='ucb': #UCB, maximizer of empirical loss + confidence term
        LCB = getEmpiricalLoss(model, counts, SO=DO, device=device, bs=batch_size)
        for i in range(len(LCB)):
            LCB[i] -= ucb_factor/sqrt(batch_size*counts[i]) 
        att = LCB.argmin().item()
    elif scheme=='epsilon-greedy':#Sample U.A.R. 100*epsilon% of the time, the attribute with the worst loss the rest
        if torch.rand((1,)).item()< epsilon:
            att = torch.randint(num_groups, size=(1,)).item()
        else:
            LCB = getEmpiricalLoss(model, counts, SO=DO, device=device, bs=batch_size)
            att = LCB.argmin().item()
    elif scheme=='dist': # Draw attribute from a specified distribution, defaulting to uniform
        if Pi is None:
            Pi = (1/num_groups)*torch.ones((num_groups,))
        att = torch.multinomial(input=Pi, num_samples=1).item()
    return att 
    

# %% [markdown]
### Creating Model, Optimizer and Loss

# %% [markdown]
Here we create an instance of the appropriate CNN model initialize the `Adam` optimizer with a learning rate of 0.001. The model is then trained for `TT_train` iterations, at each round selecting an attribute according to the chosen scheme, adding samples of it to the dataset, and executing a single gradient update over the  entire accumulated set.  We periodically measure and record the accuracy on held out test data and finally return these accuracies, the learned mixture distribution, and the trained model.  

# %% [code]
from time import time
def RunExperiment(scheme='ucb', TT=500, problem='MNIST', pairs=None, 
                  ucb_factor=0.1,
                  epsilon=0.1,
                  initial=10,
                  skip=10,
                  batch_size=50,
                  num_groups=5,
                  verbose=False, 
                  TT_test = 500,
                  num_tests = 50
):
    device = torch.device("cuda" if torch.cuda.is_available() else "cpu") 

    
    ### Initialize the Sampling Oracle 
    if problem == 'UTKFace':
        if scheme == 'naive':
            TrainingOracle = Oracle_face(dset=trainset, batch_size=1000, device=device, naive=True)
        else:
            TrainingOracle = Oracle_face(dset=trainset, batch_size=1000, device=device)
        TestingOracle = Oracle_face(dset=validationset, batch_size=batch_size*TT_test, device=device)
        model = CNN_UTK()
    else:
        if scheme == 'naive':
            TrainingOracle = Oracle_loader(dset=trainset, pairs=pairs, batch_size=1000, device=device, naive=True)
        else:
            TrainingOracle = Oracle_loader(dset=trainset, pairs=pairs, batch_size=1000, device=device)
        TestingOracle = Oracle_loader(dset=validationset, pairs=pairs, batch_size=batch_size*TT_test, device=device)
        model = CNN(problem=problem)
    
    model.to(device)
    optimizer = optim.Adam(model.parameters(), lr=0.001)
    criterion = nn.NLLLoss()
    # List of Counts of how many times each attribute is selected
    counts = torch.zeros(num_groups)
    # Track accuracy on a holdout set over time
    test_accuracy = np.empty((num_groups,50))
    j=0
    t0 = time()
    for i in range(TT):
        #Choose the attribute:
        if scheme=='uniform' or i < initial:
            att = i%num_groups
        elif scheme == 'naive':
            att=0
        elif i%skip==(skip-1):
            att = getAttribute(model, device, DO=TrainingOracle, counts=counts, scheme=scheme, 
                              initial=initial,  ucb_factor=ucb_factor, epsilon=epsilon)

        # Update the counts vector 
        counts[att]+=1
        
        # Call the oracle for new samples and initialize/add them to the training set 
        xb, yb = TrainingOracle.get_sample(att=att,batch_size=batch_size)
        temp_data = accum_set(xb,yb)
        if i==0:
            constructed_dataset = temp_data
        else:
            constructed_dataset = ConcatDataset([constructed_dataset, temp_data])
            
        trainloader = DataLoader(constructed_dataset, batch_size=batch_size, shuffle=True)
        for x,y in trainloader:
            x,y = x.to(device), y.to(device)
            #Predict, calculate loss, and take a gradient step
            pred = model(x)
            loss = criterion(pred, y)
            loss.backward() 
            optimizer.step()
            optimizer.zero_grad()
        
        t1 = time() - t0
        # Print out some information
        if i%(TT//5)==(TT//5 -1) and verbose:
            t1 = time() - t0
            print('Completed {} iterations;\t time taken = {:.2f} seconds'.format(i+1, t1))
        if i%(TT//num_tests)==(TT//num_tests - 1):
            #Calculate and store empirical loss over the _test set_ for batch_size*TT_test examples per attribute
            corr = getEmpiricalLoss(model, torch.ones(num_groups), TestingOracle, device=device, 
                                    bs=batch_size*TT_test, ucb_factor=0.0)
            test_accuracy[:,j] = corr
            j += 1
        # now return accuracy for each attribute at each time step and the mixture proportions
    return test_accuracy, counts/counts.sum(), model


# %% [markdown]
### Run Experiment
Run the experiment from here, `TT_train` controls how many rounds to train for, this needs to be adjusted to your dataset.  500 is reasonable for `FashionMNIST`, while the other two datasets benefit from longer training.  `TT_test` controls how large a sample from the test set is used to track test accuracy over time, this is just for tracking/data reporting, it's independent of the training process.  Supported schemes are `ucb`, `epsilon-greedy`, `empirical`, `uniform`, and `naive`.  

# %% [code]
#Schemes = ['ucb', epsilon-greedy', 'empirical', 'uniform', 'naive']
Schemes = ['ucb','empirical','uniform']
skip, initial = 2, 10 
num_trials = 3
problem=DatasetName
print(problem)
TT_train, TT_test = 500, 50

num_groups = 5
#control how frequently to sample testing accuracy
num_tests = 50
m = TT_train // (TT_train//num_tests)
#track accuracy for each attribute over the whole training period
#0th index scheme, 1st trial, 2nd attribute, 3rd timestep
accuracy_matrix = np.zeros((len(Schemes), num_trials, num_groups, m))
mixtures = np.zeros((len(Schemes), num_trials, num_groups))
trained_models = []
for j, scheme in enumerate(Schemes):
    print('=='*40)
    print('STARTING with SCHEME = {} for problem {}'.format(scheme, problem))
    tt0 = time()
    for trial in range(num_trials):
        '''
         Runs one experiment, building a training set from scratch up to batch_size*TT_train samples
         while training a model on the accumulating samples. Returns test accuracy and the mixture distribution
         over time as well as the final, trained model.  
        '''
        accuracy_matrix[j,trial], mixtures[j,trial], model = RunExperiment(TT=TT_train, scheme=scheme, problem=problem, pairs=pairs,
                                                                    skip=skip, initial=initial, batch_size=50, num_groups=num_groups,
                                                                    ucb_factor=0.1, epsilon=0.1, TT_test=TT_test, verbose=True) 
        trained_models.append(model)
        print('Completed trial {} of scheme {}; time elapsed = {:.2f}'.format(trial+1, scheme, time()-tt0))

    print('\n'*2)
    print('Completed scheme {} in {:.2f} seconds'.format(scheme, time()-tt0))
    print('__'*40)


# %% [code]
#General scheme for displaying the minimax accuracies, has to be tweaked for different training times and problems
for i in range(len(Schemes)):
    mean = accuracy_matrix[i].min(axis=1).mean(axis=0)
    s = accuracy_matrix[i].min(axis=1).std(axis=0)
    plt.plot(range(m), mean)
    plt.fill_between(range(m), mean-s, mean+s, alpha=.2)

ticks = [5*i for i in range(0,11)]
labels = [50*i for i in range(0,11)]
plt.title('FashionMNIST', fontsize=20, fontweight='bold')
plt.legend(('$\mathcal{A}_{opt}$', 'Greedy', 'Uniform'),fontsize=16)
plt.ylim(.7,.95)
plt.xticks(ticks=ticks,labels=labels, fontsize=14, fontweight='bold')
plt.yticks(fontsize=14, fontweight='bold')
plt.xlabel('$n$', fontsize=24, fontweight='bold')
plt.ylabel('Accuracy', fontsize=24, fontweight='bold')  
    

# %% [code]
#General scheme for dispaying per-attribute accuracy
vec = accuracy_matrix[0]
for i in range(5):
    mean = vec[:,i].mean(axis=0)
    s = vec[:,i].std(axis=0)
    plt.plot(range(m), mean)
    plt.fill_between(range(m), mean-s, mean+s, alpha=.2)
    
ticks = [5*i for i in range(0,11)]
labels = [50*i for i in range(0,11)]
plt.title('FashionMNIST, $\mathcal{A}_{opt}$', fontsize=20, fontweight='bold')
plt.legend(('(Tshirt, Shirt)','(Pullover, Coat)','(Trousers, Dress)', '(Sandals, Bag)','(Sneakers, Boots)'),fontsize=14)
plt.xticks(ticks=ticks,labels=labels, fontsize=14, fontweight='bold')
plt.yticks(fontsize=14, fontweight='bold')
plt.xlabel('$t$', fontsize=24, fontweight='bold')
plt.ylabel('Accuracy', fontsize=24, fontweight='bold')

# %% [code]
