# Supplementary material
Source: ML conference proceedings conference paper supplement (https://proceedings.neurips.cc/paper_files/paper/2021/hash/cd7c230fc5deb01ff5f7b1be1acef9cf-Abstract.html)
Supplement: Supplementary file 1 [file cd7c230fc5deb01ff5f7b1be1acef9cf-Supplemental.zip › Synth1_notebook.ipynb]

# %% [markdown]
This generates the `SyntheticData1` model described in the paper and runs the different sampling schemes on it to examine the different scheme's convergence properties to the equalizing distribution.  

# %% [code]
import numpy as np 
from time import time
import matplotlib.pyplot as plt 
from sklearn.linear_model import LogisticRegression as LogReg
import matplotlib.pyplot as plt 
plt.style.use('seaborn-whitegrid')

# %% [code]
def Oracle(att, Mu, Sig,  n_samples=2, y_prob=0.5):
  if Mu is None or Sig is None:
    raise Exception('Please initialize both  Mu and Sig tuples')
  # obtain the mean vector and covariance matrix 
  _Mu, _Sig = Mu[att], Sig[att]
  # draw n_samples independent samples from the distribution $P_z$
  features, labels = [], []
  for i in range(n_samples):
    # the labels are 1 with probability y_prob
    y = 0 if np.random.random()>y_prob else 1
    # find the mean vector and covariance matrix for given y
    mu, sig = _Mu[y], _Sig[y]
    # draw a multi-variate gaussian 
    x = np.random.multivariate_normal(mean=mu, cov=sig)
    # append the feature and label values 
    features.append(x)
    labels.append(y)
  #return the list of feature vectors and the list of label values
  return features, labels

# %% [code]
## Toy Model 1 

## Change this value to evaluate one of the two different sets of parameters considered in the paper
ToyModel='1'

if ToyModel=='1':
  Mu = (
      (np.array([-2,2]), np.array([2,-2])), 
      (np.array([-1,-1]), np.array([1,1]))
  )
  
  Sig = (
      (np.eye(2), np.eye(2)), 
      (np.eye(2), np.eye(2))
  )
else:
  ## Toy Model 2 
  Mu = (
      (np.array([-1.5,1.5]), np.array([1.5,-1.5])), 
      (np.array([-2,-2]), np.array([2,2]))
  )
  
  Sig = (
      (np.eye(2), np.eye(2)), 
      (np.eye(2), np.eye(2))
  )
  

# %% [code]

def helper1(features, labels, atts,  att=0, return_idx=False):
  Idx = [i for i,z in enumerate(atts) if z==att]
  if return_idx:
    return Idx
  if isinstance(features, list):
    Xa = np.array(features)[Idx]
    Ya = np.array(labels)[Idx]
  else: #np array 
    Xa = features[Idx]
    Ya = features[Idx]
  return Xa, Ya

def bootstrap_acc(Y, Yp, nT=100, q=0.9):
  n = len(Y)
  Acc = np.zeros((nT,))
  for i in range(nT):
    acc=0
    # get a random sample of size n
    for _ in range(n):
      j = np.random.randint(0, n)
      acc += Y[j]==Yp[j]
    Acc[i]=acc/n
  return np.quantile(Acc, 1-q)

def Experiment0(model, features1, labels1, features2, labels2, 
                attributes, n0, Mu, Sig, TT=500, rule='UCB', param=None, 
                forced='True', verbose=True):
  '''
  rule  :string   possible options are
                  ucb0 -- standard UCB
                  ucb1 -- bootstrap UCB
                  emp  -- empirical, i.e., greedy 
                  eps   -- epsilon greedy (with epsilon=param)
  '''
  # sanity check                
  assert 2*n0==len(attributes)
  # Initialize the Pi_a Vector 
  Pi_a = np.zeros((TT,))
  Pi_a[:n0] = 0.5 # set the first $n0$ elements to 0.5 (technically not correct!!)

  # start the main loop
  for t in range(2*n0, TT):
    # fit the model to the current data
    model.fit(features1, labels1)
    # Obtain the validation set for attributes
    Xa, Ya = helper1(features2, labels2, atts=attributes, att=0)
    Xb, Yb = helper1(features2, labels2, atts=attributes, att=1)
    # Predict labels on the two validation sets using model
    Yap, Ybp = model.predict(Xa), model.predict(Xb)
    # Compute the accuracy 
    acc_a = np.array([1 if ypi==yi else 0 for ypi, yi in zip(Yap, Ya)]).mean()
    acc_b = np.array([1 if ypi==yi else 0 for ypi, yi in zip(Ybp, Yb)]).mean()
    num_a = len(helper1(features1, labels1, attributes, att=0, return_idx=True))
    num_b = len(helper1(features1, labels1, attributes, att=1, return_idx=True))

    # Point Selection Rule
    if rule=='ucb0':# Optimistic Rule
      if param is None:
        param=0.1
      U_a, U_b = acc_a - param/np.sqrt(num_a), acc_b - param/np.sqrt(num_b)
    elif rule=='ucb1': # Optimistic Rule with Bootstrap ### TOO SLOW!!! avoid.
      if param is None:
        param = 0.95
      U_a, U_b = bootstrap_acc(Ya, Yap), bootstrap_acc(Yb, Ybp, q=param)
    elif rule=='emp':# Empirical Rule
      U_a, U_b = acc_a, acc_b
    elif rule=='eps':
      if param is None:
        param=0.1 # epsilon value for epsilon-greedy sampling
      if np.random.random()<param: # randomly choose one of two attributes
        if np.random.random()>0.5:
          U_a, U_b = 1, 0
        else:
          U_a, U_b = 0, 1
      else: # empirical sampling otherwise
        U_a, U_b = acc_a, acc_b

  
    # choose the attribute with lower value of the index function U 
    if num_a < np.sqrt(t) and forced:
      at=0
    elif num_b<np.sqrt(t) and forced:
      at=1
    else:
      at = 0 if U_a<U_b else 1 

    # Store the updated Pi_a value 
    Pi_a[t] = (num_a + 1)/(t+1) if at==0 else num_a/(t+1)

    # Print the values 
    if t%100==99 and verbose:
      print('U_a = {:.2f}, \t U_b = {:.2f}, \t pi_a = {}, \t at = {}\t t = {}'.format(U_a, U_b, num_a/t, at, t))
      print('\n')
    # draw a sample from the chosen attribute 
    xt, yt = Oracle(att=at, Mu=Mu, Sig=Sig, n_samples=2)
    features1.append(xt[0])
    features2.append(xt[1])
    labels1.append(yt[0])
    labels2.append(yt[1])
    attributes.append(at)

  return Pi_a
  


# %% [code]
# Run the experiment 
def runExperiment0(
    Mu,
    Sig,
    n0=2,
    rule='ucb0',
    forced='True',
    param=0.2,
    n_trials=10,
    TT=500,
    verbose=False
):

  # Initialize the vectors.
  PiM1 = np.zeros((TT,)) # first empirical moment
  PiM2 = np.zeros((TT,)) # second empirical moment
  
  start_time = time()
  for i in range(n_trials):
    print('Starting trial {}/{} with rule = {}, forced = {}'.format(
       i+1, n_trials, rule, forced 
    )
    )
    # Initialize the model
    model = LogReg()
    # Get the initial training datasets (2*n0)
    while True:
      X_temp0, Y_temp0 = Oracle(att=0, Mu=Mu, Sig=Sig, n_samples=n0)
      X_temp1, Y_temp1 = Oracle(att=1, Mu=Mu, Sig=Sig, n_samples=n0)
      features1, labels1 = X_temp0+X_temp1, Y_temp0+Y_temp1
      if len(set(labels1))>1: # ensures at least one element of each label
        break
    # Get the initial validation dataset (of size 2*n0)
    while True:
      X_temp0, Y_temp0 = Oracle(att=0, Mu=Mu, Sig=Sig, n_samples=n0)
      X_temp1, Y_temp1 = Oracle(att=1, Mu=Mu, Sig=Sig, n_samples=n0)
      features2, labels2 = X_temp0+X_temp1, Y_temp0+Y_temp1
      if len(set(labels2))>1: # ensures at least one element of each label
        break     
    # Set the attributes selected so far
    attributes = [0]*n0+[1]*n0
    # Run the experiment to get one pi vector
    pi_temp = Experiment0(model=model,
        features1=features1, labels1=labels1, features2=features2, labels2=labels2,
        attributes=attributes, n0=n0, Mu=Mu, Sig=Sig, TT=TT,
        rule=rule, param=param, forced=forced, verbose=verbose
    )
    PiM1 = (i/(i+1))*PiM1 + (1/(i+1))*pi_temp
    PiM2 = (i/(i+1))*PiM2 + (1/(i+1))*pi_temp*pi_temp
  end_time=time()
  print('Completed {} trials in {:.2f} seconds \n \n'.format(n_trials, -start_time+end_time)) 
  # get the standard deviation of Pi over n_trials trials
  PiStd = np.sqrt( PiM2 - PiM1*PiM1)
  # Return the mean and standard deviation 
  return PiM1, PiStd
  

# UCB0 rule
TT = 5000
PiMU0, PiStdU0 = runExperiment0(Mu=Mu, Sig=Sig, rule='ucb0', TT=TT, param= 2)
# PiMU1, PiStdU1 = runExperiment0(Mu=Mu, Sig=Sig, rule='ucb0', TT=TT, param= 0.2)
# Emp Rule
PiMEmp, PiStdEmp = runExperiment0(Mu=Mu, Sig=Sig, rule='emp', forced=False, TT=TT)
# Eps Rule with epsilon=0.1
PiMEps, PiStdEps = runExperiment0(Mu=Mu, Sig=Sig, rule='eps', forced=False, TT=TT, param=.5)
# Eps Rule with epsilon=0.2
# PiMEps2, PiStdEps2 = runExperiment0(Mu=Mu, Sig=Sig, rule='eps', forced=False, TT=TT, param=.2)


# %% [code]
from google.colab import files


NN = np.arange(0, len(PiMU0))

# Approximate values found numerically
optimum = 0.22 if ToyModel=='1' else 0.639
optimum = optimum*np.ones(NN.shape)


plt.plot(NN, PiMU0, label='$\mathcal{A}_{opt} $', color='red')
plt.fill_between(NN, PiMU0-PiStdU0, PiMU0+PiStdU0, alpha=0.1, color='red')
# plt.plot(NN, PiMU1, label='$\mathcal{A}_{opt} (0.1)$')
# plt.fill_between(NN, PiMU1-PiStdU1, PiMU1+PiStdU1, alpha=0.1)
plt.plot(NN, PiMEps, label='$\epsilon$-Greedy ', color='blue')
plt.fill_between(NN, PiMEps-PiStdEps, PiMEps+PiStdEps, alpha=0.1, color='blue')

plt.plot(NN, PiMEmp, label='Empirical', color='mediumpurple')
plt.fill_between(NN, PiMEmp-PiStdEmp, PiMEmp+PiStdEmp, alpha=0.1, color='mediumpurple')
# plt.plot(NN, PiMEps2, label='$\epsilon$-Greedy (0.1)')
# plt.fill_between(NN, PiMEps2-PiStdEps2, PiMEps2+PiStdEps2, alpha=0.1)


plt.plot(NN, optimum, 'k--', alpha=0.3)
plt.xlabel('$n$', fontsize=24, fontweight='bold')
plt.ylabel('$\pi_n(u)$', fontsize=24)

if ToyModel=='1':
  title = 'Synthetic Model I'
else:
  title = 'Synthetic Model II'

plt.title(title, fontsize=20)

plt.legend(fontsize=16)
if ToyModel=='1':
  figname='Expt0_first_model.png'
else:
  figname='Expt0_second_model.png'
plt.xticks(fontsize=14, fontweight='bold')
plt.yticks(fontsize=14, fontweight='bold')
plt.tight_layout()

plt.show()
# plt.savefig(figname, dpi=450)
# files.download(figname) 

# %% [markdown]
To show that with a wrong choice of $c$ for the UCB algorithm, we still get asymptotic convergence. Whereas a wrong choice in the $\epsilon$-greedy strategy may lead to $\Omega(1)$ excess risk. 

1. UCB with param 1.0 and n=5000 
2. UCB with param 2.0 and n=10000
