# Supplementary material
Source: ML conference proceedings conference paper supplement (https://proceedings.neurips.cc/paper_files/paper/2021/hash/cd7c230fc5deb01ff5f7b1be1acef9cf-Abstract.html)
Supplement: Supplementary file 1 [file cd7c230fc5deb01ff5f7b1be1acef9cf-Supplemental.zip › Synth2_notebook.ipynb]

# %% [code]
import numpy as np 
from time import time
import math
import matplotlib.pyplot as plt 
from sklearn.linear_model import LogisticRegression as LogReg
import matplotlib.pyplot as plt 
#plt.style.use('seaborn-whitegrid')
plt.style.use('ggplot')

# %% [code]
import torch
from torch.distributions import Uniform, Categorical, MultivariateNormal as mvnorm
class Oracle_2():
    def __init__(self, mu00, cov00, mu01, cov01, mix00, mix01, unif0, unif1, rot_angle=math.pi/6):
        '''
        11 is the left dumbbell, 12 the right dumbbell, unif1 is the interval for the 
        left uniform, unif2 for the right uniform, hard coding p(y)=.5 for everything for now
        mu and cov list of 3 tensors each, for the 3 components of the mixture
        '''
        #default to 30 degrees ccw, pass 0 if you don't want a rotation
        angle = torch.tensor(rot_angle)
        self.rotation = torch.tensor([[torch.cos(angle), -torch.sin(angle)],
                                        [torch.sin(angle), torch.cos(angle)]])
        self.mixture = (Categorical(mix00), Categorical(mix01))
        self.gmm = []
        dist = []
        for m,v in zip(mu00, cov00):
            dist.append(mvnorm(m,v))
        self.gmm.append(dist)
        dist = []
        for m,v in zip(mu01, cov01):
            dist.append(mvnorm(m,v))
        self.gmm.append(dist)
        self.unif = (Uniform(unif0[0], unif0[1]), Uniform(unif1[0],unif1[1]))
    
    def __call__(self, att=0, n_samples=2):
        features = []
        labels = []
        for _ in range(n_samples):
            # choose the Y label with 50/50 odds
            p = torch.rand((1,)).item()
            if p<.5:
                y=0
            else:
                y=1
                #label y==0 case: for attribute 0, pick which Gaussian to sample 
                #according to the mixture distribution, then sample from that Gaussian
            labels.append(y)
            if att==0:
                idx = self.mixture[y].sample()
                x = self.gmm[y][idx].sample()
                features.append((x @ self.rotation.T).numpy())
            #for attribute 1, sample from the associated uniform distribution
            #for the x coordinate and set y-coord=0
            elif att==1:
                x = self.unif[y].sample().item()                   
                features.append(np.array([x,0]))
        
        return features, labels

# %% [markdown]
### Visualization
This plots a sampling of the distributions specified by the parameters in lines 1-7 and can be used to tune the subjective difficulty of the different distributions. 

# %% [code]
means1 = [torch.tensor([-2.5,0.0]),torch.tensor([-0.25,3.0]),torch.tensor([-1.5,-3.0])]
var1 = [torch.tensor([[0.25,0.0],[0.0,2.0]]),torch.tensor([[1.0,0.0],[0.0,1.0]]),torch.tensor([[1.0,0.0],[0.0,1.0]])]
means2 = [torch.tensor([2.5,0.0]),torch.tensor([0.75,3.0]),torch.tensor([0.75,-3.0])]
var2 = [torch.tensor([[0.25,0.0],[0.0,2.0]]),torch.tensor([[1.0,0.0],[0.0,1.0]]),torch.tensor([[1.0,0.0],[0.0,1.0]])]
mix = torch.tensor([0.5,0.25,0.25])
unif1 = [-1.5, 0.7]
unif2 = [-0.7, 1.5]

oracle = Oracle_2(means1, var1, means2, var2, mix, mix, unif1, unif2)

X,y = oracle(att=0, n_samples=100)
for x,y in zip(X,y):
    if y==0:
        plt.scatter(x[0],x[1], c='b', marker='o', s=70)
    else:
        plt.scatter(x[0],x[1], c='b', marker='x', s=70)

X,y = oracle(att=1, n_samples=25)
for x,y in zip(X,y):
    if y==0:
        plt.scatter(x[0],x[1], c='r', marker='o', s=40)
    else:
        plt.scatter(x[0],x[1], c='r', marker='x', s=100)

plt.title('Synthetic Model II', fontsize=21, fontweight='bold')
plt.xticks(fontsize=16, fontweight='bold')
plt.yticks(fontsize=16, fontweight='bold')
plt.xlabel(' ', fontsize=10)
plt.ylabel(' ', fontsize=10)


# %% [markdown]
### Mann-Kendall Statistic
This class tracks the Mann-Kendall statistic for the accuracy of each attribute on the round after they were sampled.  `window` controls how far back-looking the statistic is: how many previous accuracies it remembers, and `param` is just a scaling parameter.  Update adds a new accuracy to the specified attribute, bumping off the oldest one if the window has been filled, and re-calculates the normalized statistic.  The call function returns the normalized, scaled statistic for the specified attribute.  

# %% [code]
#tracks losses after an attribute has been selected and calculates the associated Mann-Kendall statistic
# window controls how far back-looking it is and param is just a scaling parameter
from collections import deque
class MKStat():
    def __init__(self, num_att=2, window=20, param=.1):
        self.num_att = num_att
        self.window = window
        self.param = param
        self.accuracies = [deque() for i in range(self.num_att)]
        self.stats = [0]*self.num_att
    def update(self, idx, new_acc):
        #idx is which attribute you're updating, new_acc is the new accuracy to add
        if torch.is_tensor(new_acc):
            new_acc = new_acc.item()
        self.accuracies[idx].append(new_acc)
        #if we've exceeded our tracking window, get rid of the oldest accuracy
        m = len(self.accuracies[idx])
        if m > self.window:
            self.accuracies[idx].popleft()
            m -= 1
        #update the statistic for this attribute
        S = 0
        for i in range(m-1):
            for j in range(i+1,m):
                S += np.sign(self.accuracies[idx][j]-self.accuracies[idx][i])
        #normalize and store the statistic
        std = np.sqrt((1/18)*m*(m-1)*(2*m+5))
        if S < 0:
            S -= 1
        elif S > 0:
            S += 1
        if m>1:
            self.stats[idx] = (S/std)
    def __call__(self, idx):
        return self.param * self.stats[idx]

# %% [code]

def helper1(features, labels, atts,  att=0, return_idx=False):
  Idx = [i for i,z in enumerate(atts) if z==att]
  if return_idx:
    return Idx
  if isinstance(features, list):
    Xa = np.array(features)[Idx]
    Ya = np.array(labels)[Idx]
  else: #np array 
    Xa = features[Idx]
    Ya = features[Idx]
  return Xa, Ya
  
def Experiment0(model, oracle, mkstat, features1, labels1, features2, labels2, 
                train_attributes, val_attributes, n0, TT=500, rule='UCB', param=None, 
                forced=True, verbose=True):
  '''
  rule  :string   possible options are
                  ucb0 -- standard UCB
                  emp  -- empirical, i.e., greedy 
                  eps   -- epsilon greedy (with epsilon=param)
  '''
  # Initialize the Pi_a Vector 
  Pi_a = np.zeros((TT,))
  Pi_a[:n0] = 0.5 # set the first $n0$ elements to 0.5 (technically not correct!!)

  # start the main loop
  acc = []
  for t in range(2*n0, TT):
    # fit the model to the current data
    model.fit(features1, labels1)
    # Obtain the validation set for attributes
    Xa, Ya = helper1(features2, labels2, atts=val_attributes, att=0)
    Xb, Yb = helper1(features2, labels2, atts=val_attributes, att=1)
    # Predict labels on the two validation sets using model
    Yap, Ybp = model.predict(Xa), model.predict(Xb)
    # Compute the accuracy 
    acc_a = np.array([1 if ypi==yi else 0 for ypi, yi in zip(Yap, Ya)]).mean()
    acc_b = np.array([1 if ypi==yi else 0 for ypi, yi in zip(Ybp, Yb)]).mean()
    num_a = len(helper1(features1, labels1, train_attributes, att=0, return_idx=True))
    num_b = len(helper1(features1, labels1, train_attributes, att=1, return_idx=True))

    # Point Selection Rule
    if rule=='ucb0':# Optimistic Rule
      if param is None:
        param=0.1
      U_a, U_b = acc_a - param/np.sqrt(num_a), acc_b - param/np.sqrt(num_b)
    elif rule=='emp':# Empirical Rule
      U_a, U_b = acc_a, acc_b
    elif rule=='eps':
      if param is None:
        param=0.1 # epsilon value for epsilon-greedy sampling
      if np.random.random()<param: # randomly choose one of two attributes
        if np.random.random()>0.5:
          U_a, U_b = 1, 0
        else:
          U_a, U_b = 0, 1
      else: # empirical sampling otherwise
        U_a, U_b = acc_a, acc_b
    elif rule=='ucb+': #optimistic rule with trend statistic
        stat_a = mkstat(0)
        stat_b = mkstat(1)
        if param is None:
            param=0.1
        U_a = acc_a - param/np.sqrt(num_a) - stat_a
        U_b = acc_b - param/np.sqrt(num_b) - stat_b
  
    # choose the attribute with lower value of the index function U 
    if num_a < np.sqrt(t) and forced:
      at=0
    elif num_b<np.sqrt(t) and forced:
      at=1
    else:
      at = 0 if U_a<U_b else 1
    
    #add the accuracy for the chosen attribute to the trend statistic
    if at==0: 
        mkstat.update(idx=at, new_acc=acc_a)
    elif at==1:
        mkstat.update(idx=at, new_acc=acc_b)
    
    # Store the updated Pi_a value 
    Pi_a[t] = (num_a + 1)/(t+1) if at==0 else num_a/(t+1)

    # Print the values 
    if t%100==49 and verbose:
      print('U_a = {:.2f}, acc_a = {:.2f}, \t U_b = {:.2f}, acc_b = {:.2f}, \t pi_a = {}, \t at = {}\t t = {}'.format(U_a, acc_a, U_b, acc_b, num_a/t, at, t))
      print('\n')

    if t%(TT//100)==(TT//100 - 1):
        xt,yt = oracle(att=0, n_samples=5000)
        pred = model.predict(xt)
        ac_a = (pred==yt).mean()
        xt,yt = oracle(att=1, n_samples=5000)
        pred = model.predict(xt)
        ac_b = (pred==yt).mean()
        acc.append([ac_a,ac_b])
    # draw a sample from the chosen attribute 
    xt, yt = oracle(att=at, n_samples=2)
    features1.append(xt[0])
    features2.append(xt[1])
    labels1.append(yt[0])
    labels2.append(yt[1])
    val_attributes.append(at)
    train_attributes.append(at)
  return acc, Pi_a
  


# %% [code]
# Run the experiment 
def runExperiment0(
    n0=1,
    rule='ucb0',
    forced='True',
    param=0.1,
    n_trials=100,
    TT=500,
    verbose=True,
    window = 20,
    monoparam = 0.2
):

  # Initialize the vectors.
  start_time = time()
  # track the accuracy over time and the learned mixture distribution
  total_acc = []
  all_dist = []
  for i in range(n_trials):
    print('Starting trial {}/{} with rule = {}, forced = {}'.format(
       i+1, n_trials, rule, forced 
    )
    )
    # Initialize the model
    model = LogReg(C=.5)
    # Set the parameters for each of the distributions and initialize the oracle
    means1 = [torch.tensor([-2.5,0.0]),torch.tensor([-0.25,3.0]),torch.tensor([-1.5,-3.0])]
    var1 = [torch.tensor([[0.25,0.0],[0.0,2.0]]),torch.tensor([[1.0,0.0],[0.0,1.0]]),torch.tensor([[1.0,0.0],[0.0,1.0]])]
    means2 = [torch.tensor([2.5,0.0]),torch.tensor([0.75,3.0]),torch.tensor([0.75,-3.0])]
    var2 = [torch.tensor([[0.25,0.0],[0.0,2.0]]),torch.tensor([[1.0,0.0],[0.0,1.0]]),torch.tensor([[1.0,0.0],[0.0,1.0]])]
    mix = torch.tensor([0.5,0.25,0.25])
    unif1 = [-1.2, 1.0]
    unif2 = [-1.0, 1.2]

    oracle = Oracle_2(means1, var1, means2, var2, mix, mix, unif1, unif2, rot_angle = math.pi/6)
    #initialize M-K stat tracker
    mkstat = MKStat(num_att=2, window=window, param=monoparam)
    # Get the initial training datasets (2*n0)
    while True:
      X_temp0, Y_temp0 = oracle(att=0, n_samples=n0)
      X_temp1, Y_temp1 = oracle(att=1, n_samples=n0)
      features1, labels1 = X_temp0+X_temp1, Y_temp0+Y_temp1
      if len(set(labels1))>1: # ensures at least one element of each label
        break
    # Get the initial validation dataset (of size 10*n0) 
    while True:
      X_temp0, Y_temp0 = oracle(att=0, n_samples=10*n0)
      X_temp1, Y_temp1 = oracle(att=1, n_samples=10*n0)
      features2, labels2 = X_temp0+X_temp1, Y_temp0+Y_temp1
      if len(set(labels2))>1: # ensures at least one element of each label
        break     
    # Set the attributes selected so far
    train_attributes = [0]*n0+[1]*n0
    val_attributes = [0]*10*n0+[1]*10*n0
    # Run the experiment to get one pi vector
    acc_temp, pi_temp = Experiment0(model=model, oracle=oracle, mkstat=mkstat,
        features1=features1, labels1=labels1, features2=features2, labels2=labels2,
        train_attributes=train_attributes, val_attributes=val_attributes, n0=n0, TT=TT,
        rule=rule, param=param, forced=forced, verbose=verbose
    )
    total_acc.append(acc_temp)
    all_dist.append(pi_temp)
  end_time=time()
  print('Completed {} trials in {:.2f} seconds \n \n'.format(n_trials, -start_time+end_time)) 

  return total_acc, all_dist
  

rule = 'ucb0'
TT = 200
acc, dist = runExperiment0(rule=rule, TT=TT, forced=False, param=0.1)

torch.save(np.array(acc), rule+'_synthetic_acc.pt')
torch.save(np.array(dist), rule+'_synthetic_mix.pt')
